# Supplementary material for: The Use of Simulation in Nursing Education Programs: A Cross-Sectional Interuniversity Study
Source: Hindawi journal article supplement (doi:10.1155/2024/1091530), 2024-02-19
Supplement: f1 [file 1091530.f1.docx]

**Supplementary material.**

**Supplement 1. Questionnaire**

**Section 1: Specific information related to Simulation in Nursing Program**

| **Country** | **Questions** | | | | | |
| --- | --- | --- | --- | --- | --- | --- |
| **A**  **Simulation included in the curriculum**  *(Yes/No)* | **B**  **For how long has simulation been used in the curriculum** | **C**  **Total of hours of simulation in the curriculum (1)** | **D**  **Total of hours face-to-face spent in simulation** | **E**  **Total of hours face-to-face time spent in simulation to train technical or non-technical skills in low or medium fidelity simulation** | **F**  **Name of Subjects that uses simulation and type**  *(Basic, compulsory, optional)* |
|  |  |  |  |  |  |  |

(1) Including autonomous work, self-study, blended classes, theoretical classes, face-to –face classes, etc.

| **Country** | **Questions** | | | |
| --- | --- | --- | --- | --- |
| **G**  **Total of hours face-to-face time spent in simulation with High Fidelity Simulation to train technical or non-technical skills** | **H**  **Name of Subjects that uses simulation and type**  *(Basic, compulsory, optional)* | **I**  **Purpose/role of simulation**  *Response options (2* ***)*** | **J**  **Type of simulation in**  **low-medium and high fidelity**  *Include what you consider, some examples are: (4****)*** |
|  |  |  |  |  |

(2) - F: Simulation with formative purpose

- E: Simulation with evaluative purpose

(3) Screen-based /Computer-Based Simulation, virtual patients, partial task trainers, human patient simulator, standardized patients, integrated models, Simulation-Based Experience (Simulated Clinical Immersion, In situ), Simulation-Enhanced Interprofessional Experience, Hybrid Simulation, Manikin based, etc.

*Definitions:* [*http://www.ssih.org/dictionary*](http://www.ssih.org/dictionary)*.*

**Section 2: Specific information related to Simulation Environment**

| **Country** | **Questions** | | | | | | | |
| --- | --- | --- | --- | --- | --- | --- | --- | --- |
| **K**  **Availability of specific simulation spaces**  *(Yes/No)* | **L**  **Availability of low-medium fidelity simulator**  *(Yes/No)* | **M**  **Availability of high fidelity simulator**  *(Yes/No)* | **N**  **Number of teachers participating in the simulation program**  *(full time / part time)* | **O**  **Do teachers have simulation training background?**  *(Yes/No)* | **P**  **What kind of training?**  *Response options (4* ***)*** | **Q**  **Number of technicians working in simulation**  *(full time / part time)* | **R**  **Do you have areas of research or projects/grants related to simulation?** |
|  |  |  |  |  |  |  |  |  |

(4) - F: Formal training (certified courses, master program, etc)

- NI: Non-formal or Informal (learning from experience, self-learning, etc)

**Section 3: Expert’s opinion**

Please answer the following questions:

**A. What do you think is the role of simulation in the nursing education Program?**

**B. What are the limitations of simulation training compared to in vivo clinical training?**

**C. What is the role of high fidelity simulation in classroom based nursing education as related to in vivo clinical training?**

**D. Do you think that low-medium simulation or high fidelity simulation training could replace in vivo clinical training?**

**E. Are the simulation hours included in the total of hours of clinical training in your Nursing Program?**
